# Supplementary material
Source: publisher site journal article supplement (https://www.dovepress.com/get_supplementary_file.php?f=254354.xlsx)
Supplement: Supplementary file 1 [file get_supplementary_file.php]

## Sheet: Sheet1
Supplementary data:The information of 262 intervention clinical trials
TrialID	Public title	Date registration	Study design	Masking	Numbers of group	Sample sizes	Sample sizes per group	Primary outcome measures	Interventions	Chemical or Biologica	symptomatic severity		Category	Information	Coding
ChiCTR2000030509	Clinical Study of NK Cells in the Treatment of Novel Coronavirus Pneumonia (COVID-19)	20200305	3	3	2	60	30	1	3		1		Study design	Single Group Assignment	1
ChiCTR2000030490	To evaluate the efficacy and safety of diammonium glycyrrhizinate enteric-coated capsules combined with hydrogen-rich water in the treatment of novel coronavirus pneumonia (COVID-19)	20200304	1	4	1	100	100	4	1	F	1			Non-Randomized Parallel	2
ChiCTR2000030487	A single-center, single-arm clinical trial for azvudine in the treatment of novel coronavirus pneumonia (COVID-19)	20200304	1	4	1	10	10	1	1	A	1			Randomized Parallel	3
ChiCTR2000030484	HUMSCs and Exosomes Treating Patients with Lung Injury following Novel Coronavirus Pneumonia (COVID-19)	20200303	3	4	3	90	30	9	3		1		Masking	Double Blind	1
ChiCTR2000030483	A multicentre, randomized, controlled trial for the Ba-Duan-Jin in the adjunctive treatment of patients with common type novel coronavirus pneumonia (COVID-19)	20200303	1	4	1	16	16	12	4		1			Single Blind	2
ChiCTR2000030481	The clinical value of corticosteroid therapy timing in the treatment of novel coronavirus pneumonia (COVID-19): a prospective randomized controlled trial	20200303	3	4	3	200	66.7	1	1	D	1			Open Label	3
ChiCTR2000030480	Randomized, open, blank controlled trial for the efficacy and safety of recombinant human interferon alpha 1beta in the treatment of Wuhan patients with novel coronavirus pneumonia (COVID-19)	20200303	3	3	2	328	164	11	1	C	1			Not provided	4
ChiCTR2000030479	Study for the Effectiveness and Safety of Yi-Qi Hua-shi Jie-Du-Fang in the Treatment of the Novel Coronavirus Pneumonia (COVID-19)	20200303	3	3	2	100	50	2	2		1		Numbers of group	1 group	1
ChiCTR2000030478	Study for the Effectiveness and Safety of Compound Yuxingcao Mixture in the Treatment of the Novel Coronavirus Pneumonia (COVID-19)	20200303	3	3	2	120	60	2	2		1			2 group	2
ChiCTR2000030477	oXiris Membrane in Treating Critically Ill Hospitalized Adult Patients with novel coronavirus pneumonia (COVID-19)	20200303	1	4	1	19	19	3	7		2			3 group	3
ChiCTR2000030476	Study for meditation assists for the rehabilitation of patients with novel coronaviruse pneumonia (COVID-19)	20200303	3	3	2	200	100	10	4		1			4 group	4
ChiCTR2000030475	Cytosorb in Treating Critically Ill Hospitalized Adult Patients with novel coronavirus pneumonia (COVID-19)	20200303	1	4	1	19	19	3	7		2			5 group	5
ChiCTR2000030472	An open and controlled clinical study to evaluate the efficacy and safety of Ganovo combined with ritonavir in the treatment of novel coronavirus pneumonia (COVID-19)	20200303	2	4	2	20	10	9	1	A	1			6 group	6
ChiCTR2000030469	A randomized parallel controlled trial for LIUSHENWAN in Treatment of Novel Coronavirus Pneumonia (COVID-19)	20200302	3	4	2	96	48	2	2		1			7 group	7
ChiCTR2000030467	A Randomized Controlled Trial for the Influence of TCM Psychotherapy on Negative Emotion of Patients with Novel Coronavirus Pneumonia (COVID-19) Based on Network Platform	20200302	3	3	2	60	30	10	6		1			8 group	8
ChiCTR2000030465	Influence of nasal high-fow preoxygenation on video laryngoscope for emergency intubation in patients with critical novel coronavirus pneumonia (COVID-19)	20200302	3	3	2	70	35	9	7		2		Primary outcome measures	Virus negative conversion rate or time	1
ChiCTR2000030442	Combination of Tocilizumab, IVIG and CRRT in severe patients with novel coronavirus pneumonia (COVID-19)	20200302	1	4	1	100	100	5	1	C	2			Fever to normal time	2
ChiCTR2000030433	Application of Rehabilitation and Lung Eight-segment Exercise in Home Rehabilitation of Survivors from novel coronavirus pneumonia (COVID-19)	20200301	1	4	1	80	80	12	4		1			Mortality rate	3
ChiCTR2000030432	Application of rehabilitation and Lung eight-segment exercise in front-line nurses in the prevention of novel coronavirus pneumonia (COVID-19) epidemic	20200301	3	3	2	80	40	12	4		1			Time to clinical recovery	4
ChiCTR2000030424	A single-center, single-arm clinical trial for azvudine in the treatment of novel coronavirus pneumonia (COVID-19)	20200301	1	4	1	30	30	1	1	A	1			Inhospital time	5
ChiCTR2000030420	A Clinical Trial Study for the Influence of TCM Psychotherapy on Negative Emotion of Patients with Novel Coronavirus Pneumonia (COVID-19) Based on Network Platform	20200301	3	3	2	60	30	10	6		1			The change of pneumonia severity	6
ChiCTR2000030418	Application of rehabilitation lung exercise eight-segment exercise in patients with novel coronavirus pneumonia (COVID-19)	20200301	3	3	2	80	40	12	4		1			TCM symptom score	7
ChiCTR2000030417	Efficacy and safety of chloroquine phosphate inhalation combined with standard therapy in the treatment of novel coronavirus pneumonia (COVID-19)	20200301	3	4	2	30	15	2	1	B	1			Cure rate	8
ChiCTR2000030398	A randomized, double-blind, placebo-controlled trial for evaluation of the efficacy and safety of bismuth potassium citrate capsules in the treatment of patients with novel coronavirus pneumonia (COVID-19).	20200301	3	1	2	340	170	1	1	B	1			oxygen saturation	9
ChiCTR2000030388	Efficacy and safety of Xue-Bi-Jing injection in the treatment of severe cases of novel coronavirus pneumonia (COVID-19)	20200301	3	4	2	60	30	8	2		2			Questionnaire or scale	10
ChiCTR2000030386	Study for moxibustion in the preventing of novel coronavirus pneumonia (COVID-19)	20200218	1	4	1	1000	1000	10	8		1			The incidence of side effects	11
ChiCTR2000030381	A randomized, open-label, controlled and single-center trial to evaluate the efficacy and safety of anti-SARS-CoV-2 inactivated convalescent plasma in the treatment of novel coronavirus pneumonia (COVID-19) patient	20200229	3	3	2	40	20	4	5		1			Others	12
ChiCTR2000030333	A randomized, open-label controlled trial for the efficacy and safety of Pirfenidone in patients with severe and critical novel coronavirus pneumonia (COVID-19)	20200228	3	4	2	292	146	10	1	C	2		Interventions	Chemical or Biologica	1
ChiCTR2000030329	Clinical trial for umbilical cord blood CIK and NK cells in the treatment of mild and general patients infected with novel coronavirus pneumonia (COVID-19)	20200228	3	3	3	90	30	12	3		1			Traditional Chinese Medicine or Integrated Medicine	2
ChiCTR2000030328	Clinical application of inhaled acetylcysteine solution in the treatment of novel coronavirus pneumonia (COVID-19)	20200228	2	4	2	60	30	6	1	E	1			Cell therapy	3
ChiCTR2000030324	Traditional Chinese Medicine 'Zang-Fu Point-pressing' massage for children with novel coronavirus pneumonia (COVID-19)	20200228	1	4	1	40	40	2	8		1			Behavioral intervention	4
ChiCTR2000030317	Clinical study for a new type of Gastroscope isolation mask for preventing and controlling the novel coronavirus pneumonia (COVID-19) Epidemic period	20200228	3	3	2	300	150	12	7		1			plasma	5
ChiCTR2000030314	Traditional Chinese medicine Ma-Xing-Shi-Gan-Tang and Sheng-Jiang-San in the treatment of children with novel coronavirus pneumonia (COVID-19)	20200228	1	4	1	40	40	2	2		1			Psychological intervention	6
ChiCTR2000030312	A single-center, open-label and single arm trial to evaluate the efficacy and safety of anti-SARS-CoV-2 inactivated convalescent plasma in the treatment&	20200228	1	4	1	24	24	4	5		1			medical instruments	7
ChiCTR2000030300	Umbilical cord mesenchymal stem cells (hucMSCs) in the treatment of high risk novel coronavirus pneumonia (COVID-19) patients	20200228	1	4	1	9	9	4	3		1			Acupuncture and Massage	8
ChiCTR2000030288	Efficacy of Traditional Chinese Medicine in the Treatment of Novel Coronavirus Pneumonia (COVID-19): a Randomized Controlled Trial	20200227	3	3	2	204	102	1	2		1			Vaccine	9
ChiCTR2000030265	Study for continuous renal replacement therapy with adsorption filter in the treatment of the novel coronavirus pneumonia (COVID-19)	20200226	3	4	2	20	10	12	7		1			Other	10
ChiCTR2000030262	Clinical study for combination of anti-viral drugs and type I interferon and inflammation inhibitor TFF2 in the treatment of novel coronavirus pneumonia (COVID-19)	20200226	2	4	3	30	10	1	1	A	1		Chemical or Biologica	Antivirals	A
ChiCTR2000030261	A study for the key technology of mesenchymal stem cells exosomes atomization in the treatment of novel coronavirus pneumonia (COVID-19)	20200226	3	4	2	26	13	6	3		1			Antimalarials	B
ChiCTR2000030260	Clinical study for individualized nutritional assessment and supportive treatment of novel coronavirus pneumonia (COVID-19) patients in Tibetan Plateau	20200226	3	3	2	20	10	10	10		1			Antineoplastic and immunomodulating agents	C
ChiCTR2000030259	Evaluation Danorevir sodium tablets combined with ritonavir in the treatment of novel coronavirus pneumonia (COVID-19): a randomized, open and controlled trial	20200226	3	4	2	60	30	9	1	A	1			Glucocorticoids	D
ChiCTR2000030255	Efficacy and Safety of Jing-Yin Granule in the treatment of novel coronavirus pneumonia (COVID-19) wind-heat syndrome	20200226	3	4	2	300	150	4	2		1			Mucolytics	E
ChiCTR2000030254	the Efficacy and Safety of Favipiravir for novel coronavirus鈥搃nfected pneumonia: A multicenter, randomized, open, positive, parallel-controlled clinical study	20200226	3	4	2	240	120	9	1	A	1			Other	F
ChiCTR2000030225	Clinical Reseach of Acupuncture in the treatment of Novel Coronavirus Pneumonia (COVID-19)	20200226	3	3	2	186	93	5	8		1		symptomatic severity	Mild and moderate	1
ChiCTR2000030224	Clinical study of mesenchymal stem cells in treating severe novel coronavirus pneumonia (COVID-19)	20200226	3	4	4	32	8	9	3		2			Severe and critical	2
ChiCTR2000030219	Study for evaluation of integrated traditional Chinese and Western Medicine in the treatment of Novel Coronavirus Pneumonia (COVID-19)	20200225	1	4	1	120	120	4	2		1
ChiCTR2000030218	Study of Pinavir / Ritonavir Tablets (Trade Name: Kelizhi) Combined with Xiyanping Injection for Novel Coronavirus Pneumonia (COVID-19)	20200225	3	4	3	80	26.7	4	1	A	1
ChiCTR2000030198	Clinical research of pulmonary rehabilitation in survivors due to severe or critial novel coronavirus pneumonia (COVID-19)	20200225	3	4	2	60	30	6	2		2
ChiCTR2000030196	A multicenter, single arm, open label trial for the efficacy and safety of CMAB806 in the treatment of cytokine release syndrome of novel coronavirus pneumonia (COVID-19)	20200225	1	4	1	60	60	12	1	C	1
ChiCTR2000030188	Clinical Study on Syndrome Differentiation of TCM in Treating Severe and Critical novel coronavirus pneumonia (COVID-19)	20200224	3	4	2	120	60	7	2		2
ChiCTR2000030187	Clinical study for Lopinavir and Ritonavir in the treatment of novel coronavirus pneumonia (COVID-19)	20200224	3	4	2	60	30	12	1	A	1
ChiCTR2000030179	Experimental study of novel coronavirus pneumonia rehabilitation plasma therapy severe novel coronavirus pneumonia (COVID-19)	20200224	3	4	2	100	50	8	5		2
ChiCTR2000030173	Key techniques of umbilical cord mesenchymal stem cells for the treatment of novel coronavirus pneumonia (COVID-19) and clinical application demonstration	20200224	3	4	2	60	30	6	3		1
ChiCTR2000030170	Study for safety and efficacy of Jakotinib hydrochloride tablets in the treatment severe and acute exacerbation patients of novel coronavirus pneumonia (COVID-19)	20200224	3	4	2	16	8	4	1	C	2
ChiCTR2000030167	Clinical Trial for Recombinant Human Interleukin-2 in the Treatment of Novel Coronavirus Pneumonia (COVID-19)	20200224	3	4	2	80	40	12	1	C	1
ChiCTR2000030166	Randomized, parallel control, open trial for Qing-Wen Bai-Du-Yin combined with antiviral therapy in the treatment of novel coronavirus pneumonia (COVID-19)	20200224	3	3	2	20	10	6	2		1
ChiCTR2000030165	Clinical study for ozonated autohemotherapy in the treatment of Novel Coronavirus Pneumonia (COVID-19)	20200224	3	4	3	60	20	6	5		1
ChiCTR2000030138	Clinical Trial for Human Mesenchymal Stem Cells in the Treatment of Severe Novel Coronavirus Pneumonia (COVID-19)	20200224	3	1	2	60	30	4	3		2
ChiCTR2000030136	Humanistic Care in Patients With Novel Coronavirus Pneumonia (COVID-19)	20200224	2	4	2	130	65	5	6		1
ChiCTR2000030135	A randomized controlled trial for high-dose Vitamin C in the treatment of severe and critical novel coronavirus pneumonia (COVID-19) patients	20200224	3	4	2	39	19.5	12	1	F	2
ChiCTR2000030118	A clinical study for ''Huo-Shen'' particles in the treatment of novel coronavirus pneumonia (COVID-19)	20200223	3	4	2	120	60	6	2		1
ChiCTR2000030117	A multicenter, randomized, open, parallel controlled trial for the evaluation of the effectiveness and safety of Xiyanping injection in the treatment of common type novel coronavirus pneumonia (COVID-19)	20200223	3	3	2	348	174	4	2		1
ChiCTR2000030116	Safety and effectiveness of human umbilical cord mesenchymal stem cells in the treatment of acute respiratory distress syndrome of severe novel coronavirus pneumonia (COVID-19)	20200223	1	4	1	16	16	12	3		2
ChiCTR2000030113	Randomized controlled trial for safety and efficacy of Favipiravir in the treatment of novel coronavirus pneumonia (COVID-19) with poorly responsive ritonavir/ritonavir	20200223	3	4	2	30	15	11	1	A	1
ChiCTR2000030102	A multicenter randomized controlled trial for ozone autohemotherapy in the treatment of novel coronavirus pneumonia (COVID-19)	20200223	3	4	6	180	30	6	5		1
ChiCTR2000030093	Study for application of simplified cognitive-behavioral therapy for related emergency psychological stress reaction of medical providers working in the position of treatment and control of novel coronavirus pneumonia (COVID-19)	20200223	2	4	2	60	30	10	6		1
ChiCTR2000030091	A prospective randomized controlled trial for the home exercise prescription intervention in nursing students during epidemic of novel coronary pneumonia (COVID-19)	20200223	3	3	2	200	100	10	4		1
ChiCTR2000030090	A Prospective Randomized Controlled Trial for Home Exercise Prescription Intervention During Epidemic of Novel Coronary Pneumonia (COVID-19) in College Students	20200222	3	3	2	400	200	10	4		1
ChiCTR2000030089	A clinical study for the efficacy and safety of Adalimumab Injection in the treatment of patients with severe novel coronavirus pneumonia (COVID-19)	20200222	3	4	2	60	30	4	1	C	2
ChiCTR2000030088	Umbilical cord Wharton's Jelly derived mesenchymal stem cells in the treatment of severe novel coronavirus pneumonia (COVID-19)	20200222	3	4	2	40	20	1	3		2
ChiCTR2000030084	A multicenter study for efficacy of intelligent psychosomatic adjustment system intervention in the treatment of novel coronavirus pneumonia (COVID-19) patients with mild to moderate anxiety and depression	20200222	3	4	2	180	90	10	6		1
ChiCTR2000030082	Randomized controlled trial for the efficacy of dihydroartemisinine piperaquine in the treatment of mild/common novel coronavirus pneumonia (COVID-19)	20200222	3	3	2	40	20	1	1	B	1
ChiCTR2000030058	A multicenter, randomized, double-blind, controlled clinical trial for leflunomide in the treatment of novel coronavirus pneumonia (COVID-19)	20200222	3	1	2	200	100	1	1	C	1
ChiCTR2000030054	A prospective, open label, randomized, control trial for chloroquine or hydroxychloroquine in patients with mild and common novel coronavirus pulmonary (COVIP-19)	20200222	3	4	3	100	33.3	4	1	B	1
ChiCTR2000030046	A single arm trial to evaluate the efficacy and safety of anti-2019-nCoV inactivated convalescent plasma in the treatment of novel coronavirus pneumonia patient (COVID-19)	20200221	1	4	1	10	10	4	5		1
ChiCTR2000030043	Shen-Fu injection in the treatment of severe novel coronavirus pneumonia (COVID-19): a multicenter, randomized, open-label, controlled trial	20200221	3	4	2	300	150	6	2		2
ChiCTR2000030041	A single-arm, single-center clinical trial for Azivudine tablets in the treatment of adult novel coronavirus pneumonia (COVID-19)	20200221	1	3	1	40	40	1	1	A	1
ChiCTR2000030039	Clinical study for infusing convalescent plasma to treat patients with new coronavirus pneumonia (COVID-19)	20200221	2	4	2	90	45	1	5		1
ChiCTR2000030034	Traditional Chinese Medicine in the treatment of novel coronavirus pneumonia (COVID-19): a multicentre, randomized controlled trial	20200221	3	4	2	132	66	2	2		1
ChiCTR2000030033	A study for the intervention of Xiangxue antiviral oral solution and Wu-Zhi-Fang-Guan-Fang on close contacts of novel coronavirus pneumonia (COVID-19)	20200221	3	3	3	828	276	12	2		1
ChiCTR2000030031	A randomized, double-blind, parallel, controlled trial for comparison of phosphoric chloroquine combined with standard therapy and standard therapy in mild/common patients with novel coronavirus pneumonia (COV	20200221	3	1	2	120	60	1	1	B	1
ChiCTR2000030029	A multi-center study on the efficacy and safety of suramin sodium in adult patients with novel coronavirus pneumonia (COVID-19)	20200221	1	4	1	20	20	4	1	A	1
ChiCTR2000030028	Clinical comparative study of PD-1 mAb in the treatment of severe and critical patients with novel coronavirus pneumonia (COVID-19)	20200220	3	4	2	40	20	11	1	C	2
ChiCTR2000030027	Traditional Chinese medicine cooperative therapy for patients with Novel coronavirus pneumonia (COVID-19) and its effect on spermatogenesis: a randomized controlled trial	20200220	1	4	1	60	60	5	2		1
ChiCTR2000030020	The clinical application and basic research related to mesenchymal stem cells to treat novel coronavirus pneumonia (COVID-19)	20200220	1	4	1	20	20	1	3		1
ChiCTR2000030016	Basic and clinical study of inhalation of inactivated mycobacterium vaccine in the treatment of Novel coronavirus pneumonia (COVID-19)	20200219	3	1	2	60	30	1	9		1
ChiCTR2000030014	Effect of early pulmonary training on lung function and quality of life for novel coronavirus pneumonia (COVID-19) patients	20200220	3	3	2	300	150	6	4		1
ChiCTR2000030010	A randomized, double-blind, parallel-controlled, trial to evaluate the efficacy and safety of anti-SARS-CoV-2 virus inactivated plasma in the treatment of severe novel coronavirus pneumonia patients (COVID-19)	20200219	3	4	2	100	50	4	5		2
ChiCTR2000030007	Multicenter randomized controlled trial for rhG-CSF in the treatment of novel coronavirus pneumonia (COVID-19)	20200219	3	4	2	200	100	4	1	C	1
ChiCTR2000030006	A randomized controlled trial for the efficacy of ozonated autohemotherapy in the treatment of Novel Coronavirus Pneumonia (COVID-19)	20200219	3	2	2	60	30	8	5		1
ChiCTR2000030003	Optimization Protocal of Integrated Traditional Chinese and Western Medicine in the Treatment for Novel Coronavirus Pneumonia (COVID-19)	20200219	3	4	3	480	160	5	2		1
ChiCTR2000030002	Clinical study of novel NLRP Inflammasome inhibitor (Tranilast) in the treatment of novel coronavirus pneumonia (COVID-19)	20200219	3	4	2	60	30	8	1	C	1
ChiCTR2000030001	The efficacy and safety of Triazavirin for 2019 novel coronary pneumonia (COVID-19): a multicenter, randomized, double blinded, placebo-controlled trial	20200219	3	1	2	240	120	4	1	A	1
ChiCTR2000030000	An open, controlled clinical trial for evaluation of ganovo combined with ritonavir and integrated traditional Chinese and Western medicine in the treatment of novel coronavirus infection (COVID-19)	20200219	2	4	5	50	10	9	1	A	1
ChiCTR2000029999	A clinical study for probiotics in the regulation of intestinal function and microflora structure of novel coronavirus pneumonia (COVID-19)	20200219	3	4	2	60	30	12	10		1
ChiCTR2000029996	A randomized, open-label, controlled trial for the efficacy and safety of Farpiravir Tablets in the treatment of patients with novel coronavirus pneumonia (COVID-19)	20200220	3	3	3	60	20	4	1	A	1
ChiCTR2000029994	Liu-Zi-Jue Qigong and Acupressure Therapy for Pulmonary Function and Quality of Life in Patient with Severe novel coronavirus pneumonia (COVID-19): A Randomized Controlled Trial	20200218	3	3	2	200	100	6	8		2
ChiCTR2000029992	A prospective, randomized, open label, controlled trial for chloroquine and hydroxychloroquine in patients with severe novel coronavirus pneumonia (COVID-19)	20200218	3	3	3	100	33.3	4	1	B	2
ChiCTR2000029991	A randomized, open-label, controlled trial for the safety and efficiency of Kesuting syrup and Keqing capsule in the treatment of mild and moderate novel coronavirus pneumonia (COVID-19)	20200218	3	3	3	72	24	4	2		1
ChiCTR2000029990	Clinical trials of mesenchymal stem cells for the treatment of pneumonitis caused by novel coronavirus pneumonia (COVID-19)	20200218	3	4	2	120	60	12	3		1
ChiCTR2000029989	A randomized controlled Trial for therapeutic efficacy of Recombinant Human Interferon alpha 1b Eye Drops in the treatment of elderly with novel coronavirus pneumonia (COVID-19)	20200218	3	4	2	300	150	9	1	C	1
ChiCTR2000029988	Clinical Study of Chloroquine Phosphate in the Treatment of Severe Novel Coronavirus Pneumonia (COVID-19)	20200218	3	3	2	80	40	4	1	B	2
ChiCTR2000029984	Study on the effect of human placenta biological preparation on the defense of immune function against novel coronavirus pneumonia (COVID-19)	20200218	3	4	2	60	30	12	3		1
ChiCTR2000029978	A randomized controlled trial for the efficacy of Dao-Yin in the prevention and controlling novel coronavirus pneumonia (COVID-19)	20200218	3	1	2	186	93	5	4		1
ChiCTR2000029976	The effect of Gymnastic Qigong Yangfeifang on functional recovery and quality of life in patients with mild novel coronavirus pneumonia (COVID-19)	20200218	1	3	1	40	40	12	4		1
ChiCTR2000029974	A prospective, multicenter, open-label, randomized, parallel-controlled trial for probiotics to evaluate efficacy and safety in patients infected with 2019 novel coronavirus pneumonia (COVID-19)	20200218	3	3	2	300	150	4	10		1
ChiCTR2000029972	A randomized controlled trial for the Efficacy of Ultra Short Wave Electrotherapy in the treatment of Novel Coronavirus Pneumonia (COVID-19)	20200217	3	4	2	40	20	12	10		1
ChiCTR2000029960	Comparative study for integrate Chinese and conventional medicine the the treatment of novel coronavirus pneumonia (COVID-19) in Hu'nan province	20200217	2	4	2	100	50	7	2		1
ChiCTR2000029956	Chinese Medicine Promotes Rehabilitation Recommendations after 2019 Novel Coronavirus Infection (COVID-19)	20200217	3	4	2	120	60	10	4		1
ChiCTR2000029954	Efficacy and safety of honeysuckle oral liquid in the treatment of novel coronavirus pneumonia (COVID-19): a multicenter, randomized, controlled, open clinical trial	20200217	3	3	3	300	100	4	2		1
ChiCTR2000029947	A Randomized Controlled Trial for Qingyi No. 4 Compound in the treatment of Convalescence Patients of Novel Coronavirus Pneumonia (COVID-19)	20200216	3	4	2	200	100	6	2		1
ChiCTR2000029941	A randomized controlled trial for Traditional Chinese Medicine in the treatment for Novel Coronavirus Pneumonia (COVID-19)	20200216	3	4	2	200	100	9	2		1
ChiCTR2000029939	A Single-blind, Randomized, Controlled Clinical Trial for Chloroquine Phosphate in the treatment of Novel Coronavirus Pneumonia 2019 (COVID-19)	20200216	3	4	2	100	50	5	1	B	1
ChiCTR2000029935	A Single-arm Clinical Trial for Chloroquine Phosphate in the treatment of Novel Coronavirus Pneumonia 2019 (COVID-19)	20200216	1	4	1	100	100	5	1	B	1
ChiCTR2000029895	Single arm study for the efficacy and safety of GD31 in patients with novel coronavirus pneumonia (COVID-19)	20200216	1	4	1	160	160	1	1	A	1
ChiCTR2000029869	A multicenter, randomized, controlled trial for integrated Chinese and western medicine in the treatment of ordinary novel coronavirus pneumonia (COVID-19) based on the ' Internal and External Relieving -Truncated Torsion' strategy	20200215	3	4	2	300	150	8	2		1
ChiCTR2000029868	Hydroxychloroquine treating novel coronavirus pneumonia (COVID-19): a randomized controlled, open label, multicenter trial	20200215	3	4	2	200	100	1	1	B	1
ChiCTR2000029867	The efficacy and safety of carrimycin treatment in patients with novel coronavirus pneumonia (COVID-19): a multicenter, randomized, open-label, controlled trial	20200215	3	3	2	520	260	2	1	A	1
ChiCTR2000029855	A randomized, open and controlled clinical trial for traditional Chinese medicine in the treatment of novel coronavirus pneumonia (COVID-19)	20200215	3	4	3	180	60	7	2		1
ChiCTR2000029853	A randomized, open-label, controlled clinical trial for azvudine in the treatment of novel coronavirus pneumonia (COVID-19)	20200215	3	4	2	20	10	2	1	A	1
ChiCTR2000029851	A multicenter, randomized controlled trial for the efficacy and safety of Alpha lipoic acid (iv) in the treatment of patients of severe novel coronavirus pneumonia (COVID-19)	20200215	3	4	2	68	34	10	1	F	2
ChiCTR2000029850	Study on convalescent plasma treatment for severe patients with novel coronavirus pneumonia (COVID-19)	20200215	2	4	2	20	10	3	5		2
ChiCTR2000029849	Application of Regulating Intestinal Flora in the Treatment of Severe Novel Coronavirus Pneumonia (COVID-19)	20200215	3	4	2	60	30	5	10		2
ChiCTR2000029837	A randomized, double-blind, parallel, controlled trial for comparison of phosphoric chloroquine combined with standard therapy and standard therapy in mild/common patients with novel coronavirus pneumonia (COVID-19)	20200215	3	4	2	120	60	1	1	B	1
ChiCTR2000029826	A randomized, double-blind, parallel, controlled trial for comparison of phosphoric chloroquine combined with standard therapy and standard therapy in serious/critically ill patients with novel coronavirus pneumonia (COVID-19)	20200214	3	4	2	45	22.5	3	1	B	2
ChiCTR2000029822	A randomized controlled trial for honeysuckle decoction in the treatment of patients with novel coronavirus (COVID-19) infection	20200214	3	3	2	110	55	8	2		1
ChiCTR2000029819	Ba-Bao-Dan in the adjuvant therapy of novel coronavirus pneumonia (COVID-19) patients	20200214	2	4	2	80	40	4	2		1
ChiCTR2000029818	Clinical Study for Umbilical Cord Blood Plasma in the Treatment of Acute Novel Coronavirus Pneumonia (COVID-19)	20200214	3	3	2	60	30	4	5		1
ChiCTR2000029817	Clinical Study of Cord Blood NK Cells Combined with Cord Blood Mesenchymal Stem Cells in the Treatment of Acute Novel Coronavirus Pneumonia (COVID-19)	20200214	3	3	2	40	20	4	3		1
ChiCTR2000029816	Clinical Study for Cord Blood Mesenchymal Stem Cells in the Treatment of Acute Novel Coronavirus Pneumonia (COVID-19)	20200214	3	3	2	60	30	4	3		1
ChiCTR2000029814	Clinical Trial for Integrated Chinese and Western Medicine in the Treatment of Children with Novel Coronavirus Pneumonia (COVID-19)	20200214	2	4	2	30	15	2	2		1
ChiCTR2000029813	Clinical Trial for Tanreqing Capsules in the Treatment of Novel Coronavirus Pneumonia (COVID-19)	20200214	3	3	2	72	36	1	2		1
ChiCTR2000029812	Clinical Study for Umbilical Cord Blood Mononuclear Cells in the Treatment of Acute Novel Coronavirus Pneumonia (COVID-19)	20200214	3	3	2	60	30	4	3		1
ChiCTR2000029811	Clinical Study for Anti-aging Active Freeze-dried Powder Granules in the Treatment of Acute Novel Coronavirus Pneumonia (COVID-19)	20200214	3	3	2	60	30	4	2		1
ChiCTR2000029806	Immunomodulatory Therapy for Severe Novel Coronavirus Pneumonia (COVID-19)	20200214	3	4	3	120	40	6	1	C	2
ChiCTR2000029790	Clinical study for the integration of traditional Chinese and western medicine in the treatment of novel coronavirus pneumonia (COVID-19)	20200213	3	4	2	120	60	7	2		1
ChiCTR2000029789	Randomized controlled trial for TCM syndrome differentiation treatment impacting quality of life of post-discharge patients with novel coronavirus pneumonia (COVID-19)	20200213	3	1	2	100	50	10	2		1
ChiCTR2000029788	Traditional Chinese medicine cooperative therapy for patients with novel coronavirus pneumonia (COVID-19): a randomized controlled trial	20200213	3	4	2	60	30	2	2		1
ChiCTR2000029781	A multicenter, randomized, open and controlled trial for the efficacy and safety of Kang-Bing-Du granules in the treatment of novel coronavirus pneumonia (COVID-19)	20200213	3	3	2	160	80	2	2		1
ChiCTR2000029780	A multicenter, randomized, open, controlled trial for the efficacy and safety of Shen-Qi Fu-Zheng injection in the treatment of novel coronavirus pneumonia (COVID-19)	20200213	3	3	2	160	80	4	2		1
ChiCTR2000029778	Clinical Study for Traditional Chinese Medicine Combined With Western Medicine in Treatment of Novel Coronavirus Pneumonia (COVID-19)	20200213	2	4	4	600	150	5	2		1
ChiCTR2000029777	A multicenter, randomized, controlled trial for integrated chinese and western medicine in the treatment of novel coronavirus pneumonia (COVID-19) based on the 'Truncated Torsion' strategy	20200213	3	4	2	160	80	8	2		1
ChiCTR2000029776	A randomized, open-label, blank-controlled, multicenter trial for Polyinosinic-Polycytidylic Acid Injection in the treatment of novel coronavirus pneumonia (COVID-19)	20200213	3	3	2	40	20	4	1	C	1
ChiCTR2000029769	Babaodan Capsule used for the adjuvant treatment of severe novel coronavirus pneumonia (COVID-19)	20200213	3	4	2	40	20	3	2		2
ChiCTR2000029768	A randomized, open, controlled trial for diammonium glycyrrhizinate enteric-coated capsules combined with vitamin C tablets in the treatment of common novel coronavirus pneumonia (COVID-19) in the basic of clinical standard antiviral treatment to evaluate the safety and efficiency	20200213	3	3	2	60	30	4	1	F	1
ChiCTR2000029765	A multicenter, randomized controlled trial for the efficacy and safety of tocilizumab in the treatment of new coronavirus pneumonia (COVID-19)	20200213	3	4	2	188	94	8	1	C	1
ChiCTR2000029763	The efficacy of traditional chinese medicine on Novel Coronavirus Pneumonia (COVID-19) patients treated in square cabin hospital: a prospective, randomized controlled trial	20200212	3	3	2	408	204	8	2		1
ChiCTR2000029762	Clinical study for the effect and	20200212	3	4	2	60	30	1	1	B	1
ChiCTR2000029761	Clinical study on the safety and effectiveness of Hydroxychloroquine Sulfate tablets in the treatment of patients with novel coronavirus pneumonia (COVID-19)	20200212	3	3	4	240	60	1	1	B	1
ChiCTR2000029760	A study for the efficacy of hydroxychloroquine for mild and moderate COVID-19 infectious diseases	20200212	3	3	2	240	120	4	1	B	1
ChiCTR2000029759	Retracted due to lack of patient A multicenter, randomized, open label, controlled trial for the efficacy and safety of ASC09/ Ritonavir compound tablets and Lopinavir/ Ritonavir (Kaletra) and Arbidol tablets in the treatm	20200212	3	3	3	60	20	4	1	A	1
ChiCTR2000029757	Convalescent plasma for the treatment of severe and critical novel coronavirus pneumonia (COVID-19): a prospective randomized controlled trial	20200212	3	3	2	200	100	4	5		2
ChiCTR2000029756	Clinical study of nebulized Xiyanping injection in the treatment of novel coronavirus pneumonia (COVID-19)	20200212	3	3	2	238	119	11	2		1
ChiCTR2000029747	Effect evaluation and prognosis of Chinese medicine based on Novel Coronavirus Pneumonia (COVID-19)	20200211	3	3	2	200	100	6	2		1
ChiCTR2000029742	A randomized, parallel controlled trial for the efficacy and safety of Sodium Aescinate Injection in the treatment of patients with pneumonia (COVID-19)	20200211	3	4	5	90	18	6	2		1
ChiCTR2000029741	Efficacy of Chloroquine and Lopinavir/ Ritonavir in mild/general novel coronavirus (CoVID-19) infections: a prospective, open-label, multicenter randomized controlled clinical study	20200211	3	3	2	112	56	5	1	B	1
ChiCTR2000029740	Efficacy of therapeutic effects of hydroxycholoroquine in novel coronavirus pneumonia (COVID-19) patients(randomized open-label control clinical trial)	20200211	3	4	2	78	39	9	1	B	1
ChiCTR2000029739	A Multicenter, Randomized, Parallel Controlled Clinical Study of Hydrogen-Oxygen Nebulizer to Improve the Symptoms of Patients With Novel Coronavirus Pneumonia (COVID-19)	20200211	3	4	2	440	220	3	7		1
ChiCTR2000029658	Nasal high-fow preoxygenation assisted fibre-optic bronchoscope intubation in patients with critical novel coronavirus pneumonia (COVID-19)	20200209	3	4	2	60	30	9	7		2
ChiCTR2000029639	Study for Mental health and psychological status of doctors, nurses and patients in novel coronavirus pneumonia (COVID-19) designated hospital and effect of interventions	20200208	3	4	4	192	48	11	6		1
ChiCTR2000029638	A Multicenter, Randomized, Controlled trial for Recombinant Super-Compound Interferon (rSIFN-co) in the Treatment of 2019 Novel Coronavirus (2019-nCoV) Infected Pneumonia	20200208	3	2	2	100	50	4	1	C	1
ChiCTR2000029636	Efficacy and safety of aerosol inhalation of vMIP in the treatment of novel coronavirus pneumonia (COVID-19): a single arm clinical trial	20200208	1	4	1	40	40	1	1	C	1
ChiCTR2000029621	Clinical study of arbidol hydrochloride tablets in the treatment of novel coronavirus pneumonia (COVID-19)	20200207	3	3	2	380	190	1	1	A	1
ChiCTR2000029609	A prospective, open-label, multiple-center study for the efficacy of chloroquine phosphate in patients with novel coronavirus pneumonia (COVID-19)	20200206	2	3	5	205	41	1	1	B	1
ChiCTR2000029606	Clinical Study for Human Menstrual Blood-Derived Stem Cells in the Treatment of Acute Novel Coronavirus Pneumonia (COVID-19)	20200207	3	3	5	63	12.6	3	3		1
ChiCTR2000029605	A randomized, open-label, blank-controlled, multicenter trial for Shuang-Huang-Lian oral solution in the treatment of ovel coronavirus pneumonia (COVID-19)	20200207	3	3	4	400	100	4	2		1
ChiCTR2000029603	A Randomized, Open-Label, Multi-Centre Clinical Trial Evaluating and Comparing the Safety and Efficiency of ASC09/Ritonavir and Lopinavir/Ritonavir for Confirmed Cases of Novel Coronavirus Pneumonia (COVID-19)	20200206	3	3	2	160	80	9	1	A	1
ChiCTR2000029601	Community based prevention and control for Chinese medicine in the treatment of novel coronavirus pneumonia (COVID-19) in the isolate suspected and confirmed population	20200206	3	4	2	400	200	1	2		1
ChiCTR2000029600	Clinical study for safety and efficacy of Favipiravir in the treatment of novel coronavirus pneumonia (COVID-19)	20200206	2	4	3	90	30	1	1	A	1
ChiCTR2000029589	An open, prospective, multicenter clinical study for the efficacy and safety of Reduning injection in the treatment of ovel coronavirus pneumonia (COVID-19)	20200205	2	3	2	60	30	2	2		1
ChiCTR2000029580	Severe novel coronavirus pneumonia (COVID-19) patients treated with ruxolitinib in combination with mesenchymal stem cells: a prospective, single blind, randomized controlled clinical trial	20200205	3	2	2	70	35	11	1	C	2
ChiCTR2000029578	Chinese medicine prevention and treatment program for novel coronavirus pneumonia (COVID-19): a perspective, sing-arm trial	20200205	1	4	1	1000	1000	8	2		1
ChiCTR2000029573	A multicenter, randomized, open, controlled clinical study to evaluate the efficacy and safety of recombinant cytokine gene-derived protein injection in combination with standard therapy in patients with novel coronavirus infection	20200205	3	3	2	200	100	1	1	A	1
ChiCTR2000029572	Safety and efficacy of umbilical cord blood mononuclear cells in the treatment of severe and critically novel coronavirus pneumonia(COVID-19): a randomized controlled clinical trial	20200205	3	2	2	30	15	6	3		2
ChiCTR2000029569	Safety and efficacy of umbilical cord blood mononuclear cells conditioned medium in the treatment of severe and critically novel coronavirus pneumonia (COVID-19): a randomized controlled trial	20200204	3	4	2	30	15	6	3		2
ChiCTR2000029559	Therapeutic effect of hydroxychloroquine on novel coronavirus pneumonia (COVID-19)	20200204	3	1	3	300	100	1	1	B	1
ChiCTR2000029558	Recommendations of Integrated Traditional Chinese and Western Medicine for Diagnosis and Treatment of Novel Coronavirus Pneumonia (COVID-19) in Sichuan Province	20200204	1	4	1	200	200	11	2		1
ChiCTR2000029548	Randomized, open-label, controlled trial for evaluating of the efficacy and safety of Baloxavir Marboxil, Favipiravir, and Lopinavir-Ritonavir in the treatment of novel coronavirus pneumonia (COVID-19) patients	20200204	3	3	3	30	10	1	1	A	1
ChiCTR2000029544	A randomized controlled trial for the efficacy and safety of Baloxavir Marboxil, Favipiravir tablets in novel coronavirus pneumonia (COVID-19) patients who are still positive on virus detection under the current antiviral therapy	20200203	3	4	3	30	10	1	1	A	1
ChiCTR2000029542	Study for the efficacy of chloroquine in patients with novel coronavirus pneumonia (COVID-19)	20200203	2	4	2	20	10	1	1	B	1
ChiCTR2000029541	A randomised, open, controlled trial for darunavir/cobicistat or Lopinavir/ritonavir combined with thymosin a1 in the treatment of novel coronavirus pneumonia (COVID-19)	20200203	3	4	3	100	33.3	1	1	A	1
ChiCTR2000029539	A randomized, open-label study to evaluate the efficacy and safety of Lopinavir-Ritonavir in patients with mild novel coronavirus pneumonia (COVID-19)	20200203	3	3	2	328	164	9	1	A	1
ChiCTR2000029518	Chinese medicine prevention and treatment program for novel coronavirus pneumonia (COVID-19): a perspective, double-blind, placebo, randomised controlled trial	20200203	3	1	3	110	36.7	4	2		1
ChiCTR2000029517	Chinese medicine prevention and treatment program for suspected novel coronavirus pneumonia (COVID-19): a perspective, double-blind, placebo, randomised controlled trial	20200203	3	1	2	100	50	4	2		1
ChiCTR2000029495	Traditional Chinese Medicine, Psychological Intervention and Investigation of Mental Health for Patients With Novel Coronavirus Pneumonia (COVID-19) in Convalescent Period	20200202	3	3	3	90	30	10	6		1
ChiCTR2000029493	Traditional Chinese Medicine for Pulmonary Fibrosis, Pulmonary Function and Quality of Life in Patients With Novel Coronavirus Pneumonia (COVID-19) in Convalescent Period: a Randomized Controlled Trial	20200202	3	4	2	100	50	6	2		1
ChiCTR2000029468	A real-world study for lopinavir/ritonavir (LPV/r) and emtritabine (FTC) / Tenofovir alafenamide Fumarate tablets (TAF) regimen in the treatment of novel coronavirus pneumonia (COVID-19)	20200202	2	4	2	120	60	3	1	A	1
ChiCTR2000029461	A Randomized Controlled Trial for Integrated Traditional Chinese Medicine and Western Medicine in the Treatment of Common Type Novel Coronavirus Pneumonia (COVID-19)	20200202	3	4	2	60	30	6	2		1
ChiCTR2000029460	The effect of shadowboxing for pulmonary function and quality of life in patients with novel coronavirus pneumonia (COVID-19) in rehabilitation period	20200202	3	3	2	100	50	6	4		1
ChiCTR2000029459	The effect of pulmonary rehabilitation for pulmonary function and quality of life in patients with novel coronavirus pneumonia (COVID-19) in rehabilitation period	20200202	3	4	2	100	50	6	2		1
ChiCTR2000029439	Combination of traditional Chinese medicine and western medicine in the treatment of common type novel coronavirus pneumonia (COVID-19)	20200201	3	4	2	120	60	2	2		1
ChiCTR2000029438	A randomized controlled trial of integrated TCM and Western Medicine in the treatment of severe novel coronavirus pneumonia (COVID-19)	20200201	3	4	2	100	50	4	2		2
ChiCTR2000029436	A single arm study for evaluation of integrated traditional Chinese and western medicine in the treatment of novel coronavirus pneumonia (COVID-19)	20200201	2	4	2	100	50	1	2		1
ChiCTR2000029435	Randomized controlled trial for traditional Chinese medicine in the prevention of novel coronavirus pneumonia (COVID-19) in high risk population	20200201	3	4	8	160	20	1	2		1
ChiCTR2000029434	A randomized, open-label, blank-controlled trial for Lian-Hua Qing-Wen Capsule /Granule in the treatment of novel coronavirus pneumonia (COVID-19)	20200201	3	3	2	240	120	4	2		1
ChiCTR2000029433	A randomized, open-label, blank-controlled trial for Lian-Hua Qing-Wen Capsule/Granule in the treatment of suspected novel coronavirus pneumonia (COVID-19)	20200201	3	4	2	240	120	4	2		1
ChiCTR2000029432	A Real World Study for the Efficacy and Safety of Large Dose Tanreqing Injection in the Treatment of Patients with Novel Coronavirus Pneumonia (COVID-19)	20200201	1	4	1	72	72	2	2		1
ChiCTR2000029431	Clinical study for the remedy of M1 macrophages target in the treatment of novel coronavirus pneumonia (COVID-19)	20200201	3	4	3	45	15	6	1	D	1
ChiCTR2000029400	Clinical Controlled Trial for Traditional Chinese Medicine in the treatment of Novel Coronavirus Pneumonia (COVID-19)	20200129	2	4	3	60	20	4	2		1
ChiCTR2000029387	Comparative effectiveness and safety of ribavirin plus interferon-alpha, lopinavir/ritonavir plus interferon-alpha and ribavirin plus lopinavir/ritonavir plus interferon-alphain in patients with mild to moderate novel coronavirus pneumonia	20200129	3	4	3	108	36	1	1	A	1
ChiCTR2000029381	A prospective comparative study for Xue-Bi-Jing injection in the treatment of novel coronavirus pneumonia (COVID-19)	20200127	2	4	2	400	200	6	2		1
ChiCTR2000029308	A randomized, controlled open-label trial to evaluate the efficacy and safety of lopinavir-ritonavir in hospitalized patients with novel coronavirus pneumonia (COVID-19)	20200123	3	3	2	160	80	4	1	A	1
ChiCTR2000029418	Chinese Herbal medicine for Severe nevel coronavirus pneumonia (COVID-19): a Randomized Controlled Trial	20200130	3	4	2	42	21	8	2		2
ChiCTR2000030681	An anaesthesia procedure and extubation strategy for reducing patient agitation and cough after extubation that can be used to prevent the spread of Novel Coronavirus Pneumonia (COVID-19) and other infectious viruses in the operating Room	20200309	3	4	4	240	60	4	10		1
ChiCTR2000030627	Study for using the healed novel coronavirus pneumonia (COVID-19) patients plasma in the treatment of severe critical cases	20200308	3	4	2	30	15	2	5		2
ChiCTR2000030578	Clinical Prediction and Intervention of Pulmonary Function Impairment in Patients with Novel Coronavirus Pneumonia (COVID-19)	20200308	3	2	2	40	20	9	4		1
ChiCTR2000030545	Efficacy and safety of honeysuckle oral liquid in the treatment of novel coronavirus pneumonia (COVID-19): a multicenter, randomized, controlled, open clinical trial	20200306	3	4	3	300	100	8	2		1
ChiCTR2000030540	Research for the mechanism of improvement of novel coronavirus pneumonia (COVID-19) patients' pulmonary exudation by continuous renal replacement therapy	20200306	3	4	2	152	76	6	10		1
ChiCTR2000030539	Study for clinical oral characteristics of patients with novel coronavirus pneumonia (COVID-19) and Effect of 3% hydrogen peroxide gargle on the Intraoral novel coronavirus	20200306	1	4	2	40	20	1	1	F	1
ChiCTR2000030535	Multi-Center Clinical Study on the Treatment of Patients with Novel Coronavirus Pneumonia (COVID-19) by Ebastine	20200306	3	2	2	100	50	8	1	F	1
ChiCTR2000030522	Efficacy and safety of Ma-Xing-Gan-Shi decoction in the treatment of novel coronavirus pneumonia (COVID-19)	20200306	3	1	2	100	50	8	2		1
ChiCTR2000030518	Zedoary Turmeric Oil for Injection in the treatment of Novel Coronavirus Pneumonia (COVID-19): a randomized, open, controlled trial	20200305	3	4	2	60	30	1	2		1
NCT04291053	The Efficacy and Safety of Huai er in the Adjuvant Treatment of COVID-19	20200227	3	3	2	550	275	3	2		1
NCT04287686	Recombinant Human Angiotensin-converting Enzyme 2 (rhACE2) as a Treatment for Patients With COVID-19	20200221	3	3	2	24	12	2	1	F	1
NCT04273529	The Efficacy and Safety of Thalidomide in the Adjuvant Treatment of Moderate New Coronavirus (COVID-19) Pneumonia	20200214	3	1	2	100	50	4	1	C	1
NCT04273581	The Efficacy and Safety of Thalidomide Combined With Low-dose Hormones in the Treatment of Severe COVID-19	20200214	3	1	2	40	20	4	1	C	2
NCT04280588	Fingolimod in COVID-19	20200220	1	3	2	30	15	6	1	C	1
NCT04293692	Therapy for Pneumonia Patients iInfected by 2019 Novel Coronavirus	20200224	3	1	2	48	24	6	3		1
NCT04288102	Treatment With Mesenchymal Stem Cells for Severe Corona Virus Disease 2019(COVID-19)	20200224	3	1	2	45	22.5	4	3		2
NCT04286503	The Clinical Study of Carrimycin on Treatment Patients With COVID-19	20200225	3	3	3	520	173.3	2	1	F	1
NCT04273321	Efficacy and Safety of Corticosteroids in COVID-19	20200215	3	3	2	400	200	8	1	D	1
NCT04276896	Immunity and Safety of Covid-19 Synthetic Minigene Vaccine	20200217	1	3	1	100	100	4	9		1
NCT04295551	Multicenter Clinical Study on the Efficacy and Safety of Xiyanping Injection in the Treatment of New Coronavirus Infection Pneumonia (General and Severe)	20200303	3	3	3	80	26.7	4	2		2
NCT04278963	Yinhu Qingwen Decoction for the Treatment of Mild / Common CoVID-19	20200219	3	1	3	300	100	4	2		1
NCT04273763	Evaluating the Efficacy and Safety of Bromhexine Hydrochloride Tablets Combined With Standard Treatment/ Standard Treatment in Patients With Suspected and Mild Novel Coronavirus Pneumonia (COVID-19)	20200214	3	3	2	60	30	4	1	E	1
NCT04285190	The Effect of T89 on Improving Oxygen Saturation and Clinical Symptoms in Patients With COVID-19	20200219	3	3	2	120	60	9	2		1
NCT04268537	Immunoregulatory Therapy for 2019-nCoV	20200208	3	2	3	120	40	6	1	C	1
NCT04252664	A Trial of Remdesivir in Adults With Mild and Moderate COVID-19	20200131	3	1	2	308	154	4	1	A	1
NCT04251767	Washed Microbiota Transplantation for Patients With 2019-nCoV Infection	20200130	3	1	2	40	20	4	10		1
NCT04252118	Mesenchymal Stem Cell Treatment for Pneumonia Patients Infected With COVID-19	20200127	1	3	2	20	10	6	3		1
NCT04273646	Study of Human Umbilical Cord Mesenchymal Stem Cells in the Treatment of Severe COVID-19	20200214	3	3	2	48	24	6	3		2
NCT04261426	The Efficacy of Intravenous Immunoglobulin Therapy for Severe 2019-nCoV Infected Pneumonia	20200206	3	3	2	80	40	4	1	C	2
NCT04255017	A Prospective/Retrospective,Randomized Controlled Clinical Study of Antiviral Therapy in the 2019-nCoV Pneumonia	20200202	3	2	4	400	100	3	1	A	1
NCT04254874	A Prospective/Retrospective,Randomized Controlled Clinical Study of Interferon Atomization in the 2019-nCoV Pneumonia	20200202	3	2	2	100	50	3	1	A	1
NCT04275414	Bevacizumab in Severe or Critical Patients With COVID-19 Pneumonia	20200214	1	3	1	20	20	9	1	C	2
NCT04261270	A Randomized,Open,Controlled Clinical Study to Evaluate the Efficacy of ASC09F and Ritonavir for 2019-nCoV Pneumonia	20200204	3	2	3	60	20	3	1	A	1
NCT04263402	The Efficacy of Different Hormone Doses in 2019-nCoV Severe Pneumonia	20200202	3	2	2	100	50	3	1	D	2
NCT04279197	Treatment of Pulmonary Fibrosis Due to 2019-nCoV Pneumonia With Fuzheng Huayu	20200215	3	1	2	136	68	6	2		1
NCT04264858	Treatment of Acute Severe 2019-nCoV Pneumonia With Immunoglobulin From Cured Patients	20200208	1	3	2	10	5	4	1	C	2
NCT04293887	Efficacy and Safety of IFN-a2脽 in the Treatment of Novel Coronavirus Patients	20200215	3	3	2	328	164	11	1	A	1
NCT04290871	Nitric Oxide Gas Inhalation for Severe Acute Respiratory Syndrome in COVID-19.	20200227	3	1	2	104	52	8	1	F	2
NCT04260594	Clinical Study of Arbidol Hydrochloride Tablets in the Treatment of Pneumonia Caused by Novel Coronavirus	20200206	3	3	2	380	190	1	1	A	1
NCT04291729	Evaluation of Ganovo (Danoprevir ) Combined With Ritonavir in the Treatment of SARS-CoV-2 Infection	20200227	1	3	5	50	10	11	1	A	1
NCT04290858	Nitric Oxide Gas Inhalation Therapy for Mild/Moderate COVID19 Infection (NoCovid)	20200225	3	1	2	400	200	1	1	F	1
NCT04257656	A Trial of Remdesivir in Adults With Severe COVID-19	20200131	3	1	2	453	226.5	4	1	A	2
NCT04269525	Umbilical Cord(UC)-Derived Mesenchymal Stem Cells(MSCs) Treatment for the 2019-novel Coronavirus(nCOV) Pneumonia	20200207	1	3	1	10	10	9	3		1
NCT04261907	Evaluating and Comparing the Safety and Efficiency of ASC09/Ritonavir and Lopinavir/Ritonavir for Novel Coronavirus Infection	20200206	3	3	2	160	80	11	1	A	1
NCT04264533	Vitamin C Infusion for the Treatment of Severe 2019-nCoV Infected Pneumonia	20200204	3	1	2	140	70	3	1	F	2
NCT04275388	Xiyanping Injection for the Treatment of New Coronavirus Infected Pneumonia	20200217	3	3	2	348	174	4	2		1
NCT04252274	Efficacy and Safety of Darunavir and Cobicistat for Treatment of COVID-19	20200129	3	3	2	30	15	1	1	A	1
NCT04261517	Efficacy and Safety of Hydroxychloroquine for Treatment of COVID-19	20200206	3	3	2	30	15	1	1	B	1
NCT04251871	Treatment and Prevention of Traditional Chinese Medicines (TCMs) on 2019-nCoV Infection	20200128	3	3	2	150	75	8	2		1
NCT04275245	Clinical Study of Anti-CD147 Humanized Meplazumab for Injection to Treat With 2019-nCoV Pneumonia	20200206	1	3	1	20	20	1	1	B	1
NCT04280224	NK Cells Treatment for COVID-19	20200213	3	3	2	30	15	4	3		1
NCT04244591	Glucocorticoid Therapy for COVID-19 Critically Ill Patients With Severe Acute Respiratory Failure	20200123	3	3	2	80	40	6	1	D	2
NCT04276688	Lopinavir/ Ritonavir, Ribavirin and IFN-beta Combination for nCoV Treatment	20200211	3	3	2	70	35	1	1	A	1
NCT04276987	A Pilot Clinical Study on Inhalation of Mesenchymal Stem Cells Exosomes Treating Severe Novel Coronavirus Pneumonia	20200216	1	3	1	30	30	11	3		2
NCT04299724	Safety and Immunity of Covid-19 aAPC Vaccine	20200305	1	3	1	100	100	11	9		1
NCT04299152	Stem Cell Educator Therapy Treat the Viral Inflammation in COVID-19	20200228	3	2	2	20	10	12	3		1
NCT04283838	Humanistic Care in Healthcare Workers in Coronavirus Disease 2019	20200225	1	3	1	130	130	10	6		1
NCT04283825	Humanistic Care in Patients With Coronavirus Disease 2019	20200225	1	3	2	100	50	4	6		1
ChiCTR2000029549	Recommendations of Integrated Traditional Chinese and Western Medicine for Novel Coronavirus Pneumonia (COVID-19)	20200204	2	4	2	400	200	3	2		1
